# Supplementary material for: Evaluation of Immunogenicity and Safety of Vero Cell-Derived Inactivated COVID-19 Vaccine in Older Patients with Hypertension and Diabetes Mellitus
Source: Vaccines (Basel). 2022 Jun 25;10(7):1020. doi: 10.3390/vaccines10071020 (PMC9315836; doi:10.3390/vaccines10071020)
Supplement: Supplementary file 1 [file vaccines-10-01020-s001.zip › SupplementaryTable1-5_0602.pdf]

**Table S1. Neutralizing antibodies to live SARS-Cov-2**

| Variable               | Geometric mean titers (95% CI) | <i>p</i> value* |
|------------------------|--------------------------------|-----------------|
| Comorbidity            |                                |                 |
| Healthy population     | 74.86(69.49,80.64)             | -               |
| Hypertension group     | 73.41(67.24,80.14)             | 0.567           |
| Diabetes group         | 69.93(63.59,76.89)             | 0.095           |
| Combined disease group | 73.84(66.70,81.75)             | 0.567           |
| Age                    |                                | 0.114           |
| 60-69 years older      | 75.33(71.52,79.35)             |                 |
| 70 years and older     | 68.35(62.96,74.19)             |                 |
| Gender                 |                                | <0.001          |
| Male                   | 63.04(59.14,67.20)             |                 |
| Female                 | 83.35(78.57,88.42)             |                 |
| Age * Gender           |                                | 0.105           |

\*Analyzed by Generalized Linear Model

**Table S2-1 Adverse events related to the study vaccine 0-21 days after two doses of vaccine in the male**

| Adverse events                                  | Hypertension group |       |                | Diabetes group |        |           | Combined disease group |        |           | Healthy population |        |           | Statistical method  | Statistic | P*     |
|-------------------------------------------------|--------------------|-------|----------------|----------------|--------|-----------|------------------------|--------|-----------|--------------------|--------|-----------|---------------------|-----------|--------|
|                                                 | (157 assigned)     |       |                | (137 assigned) |        |           | (120 assigned)         |        |           | (256 assigned)     |        |           |                     |           |        |
|                                                 | No. of             |       |                | Case           | No. of | Incidence | Case                   | No. of | Incidence | Case               | No. of | Incidence |                     |           |        |
|                                                 | Case times         | cases | Incidence rate | times          | cases  | rate      | times                  | cases  | rate      | times              | cases  | rate      |                     |           |        |
| Total                                           | 39                 | 25    | 15.92          | 77             | 29     | 21.17     | 54                     | 20     | 16.67     | 80                 | 38     | 14.84     | Chi-Square Test     | 2.666     | 0.4461 |
| Solicited event                                 | 22                 | 17    | 10.83          | 43             | 21     | 15.33     | 20                     | 8      | 6.67      | 25                 | 14     | 5.47      | Chi-Square Test     | 12.088    | 0.0071 |
| Local adverse events                            | 8                  | 8     | 5.10           | 10             | 9      | 6.57      | 2                      | 2      | 1.67      | 7                  | 6      | 2.34      | Fisher's Exact Test | -         | 0.0844 |
| Soreness                                        | 6                  | 6     | 3.82           | 7              | 6      | 4.38      | 1                      | 1      | 0.83      | 7                  | 6      | 2.34      | Fisher's Exact Test | -         | 0.2774 |
| Pruritus                                        | 1                  | 1     | 0.64           | 1              | 1      | 0.73      | 1                      | 1      | 0.83      | 0                  | 0      | 0.00      | Fisher's Exact Test | -         | 0.3197 |
| Systemic adverse events                         | 14                 | 10    | 6.37           | 33             | 15     | 10.95     | 18                     | 8      | 6.67      | 18                 | 10     | 3.91      | Chi-Square Test     | 7.385     | 0.0606 |
| Dizziness                                       | 6                  | 5     | 3.18           | 12             | 9      | 6.57      | 3                      | 3      | 2.50      | 8                  | 6      | 2.34      | Fisher's Exact Test | -         | 0.1907 |
| Fatigue/lethargy                                | 1                  | 1     | 0.64           | 4              | 4      | 2.92      | 3                      | 3      | 2.50      | 3                  | 3      | 1.17      | Fisher's Exact Test | -         | 0.3459 |
| Headache                                        | 2                  | 2     | 1.27           | 5              | 5      | 3.65      | 2                      | 2      | 1.67      | 0                  | 0      | 0.00      | Fisher's Exact Test | -         | 0.0102 |
| Cough                                           | 1                  | 1     | 0.64           | 1              | 1      | 0.73      | 3                      | 3      | 2.50      | 2                  | 2      | 0.78      | Fisher's Exact Test | -         | 0.5097 |
| Chest tightness                                 | 1                  | 1     | 0.64           | 4              | 3      | 2.19      | 1                      | 1      | 0.83      | 0                  | 0      | 0.00      | Fisher's Exact Test | -         | 0.0580 |
| Nausea                                          | 1                  | 1     | 0.64           | 3              | 3      | 2.19      | 1                      | 1      | 0.83      | 0                  | 0      | 0.00      | Fisher's Exact Test | -         | 0.0580 |
| Arthralgia                                      | 1                  | 1     | 0.64           | 0              | 0      | 0.00      | 0                      | 0      | 0.00      | 2                  | 2      | 0.78      | Fisher's Exact Test | -         | 0.8897 |
| Muscle pain                                     | 1                  | 1     | 0.64           | 0              | 0      | 0.00      | 0                      | 0      | 0.00      | 2                  | 2      | 0.78      | Fisher's Exact Test | -         | 0.8897 |
| Anorexia                                        | 0                  | 0     | 0.00           | 1              | 1      | 0.73      | 0                      | 0      | 0.00      | 1                  | 1      | 0.39      | Fisher's Exact Test | -         | 0.8207 |
| Unsolicited event                               | 17                 | 14    | 8.92           | 34             | 13     | 9.49      | 34                     | 15     | 12.50     | 55                 | 30     | 11.72     | Chi-Square Test     | 1.411     | 0.7031 |
| Musculoskeletal and connective tissue disorders | 2                  | 2     | 1.27           | 9              | 4      | 2.92      | 13                     | 4      | 3.33      | 14                 | 6      | 2.34      | Fisher's Exact Test | -         | 0.6855 |

|                                                       |   |   |      |   |   |      |   |   |      |    |   |      |                     |   |        |
|-------------------------------------------------------|---|---|------|---|---|------|---|---|------|----|---|------|---------------------|---|--------|
| Gastrointestinal diseases                             | 0 | 0 | 0.00 | 7 | 4 | 2.92 | 3 | 2 | 1.67 | 16 | 9 | 3.52 | Fisher's Exact Test | - | 0.0661 |
| Systemic disease and<br>administration site reactions | 2 | 2 | 1.27 | 7 | 6 | 4.38 | 5 | 5 | 4.17 | 5  | 3 | 1.17 | Fisher's Exact Test | - | 0.0868 |
| Respiratory system, chest and<br>mediastinal diseases | 5 | 4 | 2.55 | 3 | 2 | 1.46 | 1 | 1 | 0.83 | 4  | 3 | 1.17 | Fisher's Exact Test | - | 0.6911 |
| Neurological diseases                                 | 3 | 3 | 1.91 | 3 | 2 | 1.46 | 2 | 2 | 1.67 | 4  | 4 | 1.56 | Fisher's Exact Test | - | 1.0000 |
| Metabolic and nutritional                             | 1 | 1 | 0.64 | 2 | 2 | 1.46 | 4 | 2 | 1.67 | 0  | 0 | 0.00 | Fisher's Exact Test | - | 0.1020 |
| Kidney and urinary system                             | 0 | 0 | 0.00 | 1 | 1 | 0.73 | 0 | 0 | 0.00 | 6  | 4 | 1.56 | Fisher's Exact Test | - | 0.3245 |
| Skin and subcutaneous tissue                          | 3 | 3 | 1.91 | 0 | 0 | 0.00 | 0 | 0 | 0.00 | 1  | 1 | 0.39 | Fisher's Exact Test | - | 0.1407 |
| Injuries, poisoning and<br>operation complications    | 1 | 1 | 0.64 | 0 | 0 | 0.00 | 0 | 0 | 0.00 | 2  | 1 | 0.39 | Fisher's Exact Test | - | 1.0000 |
| Reproductive system and<br>breast diseases            | 0 | 0 | 0.00 | 0 | 0 | 0.00 | 0 | 0 | 0.00 | 2  | 1 | 0.39 | Fisher's Exact Test | - | 1.0000 |
| Heart diseases                                        | 0 | 0 | 0.00 | 0 | 0 | 0.00 | 0 | 0 | 0.00 | 1  | 1 | 0.39 | Fisher's Exact Test | - | 1.0000 |

---

\*Kruskal-Wallis test

**Table S2-2 Adverse events related to the study vaccine 0-21 days after two doses of vaccine in the female**

| Adverse events              | Hypertension group |            |                | Diabetes group |           |       | Combined disease group |           |       | Healthy population |           |       | Statistical method | Statistic | P*     |
|-----------------------------|--------------------|------------|----------------|----------------|-----------|-------|------------------------|-----------|-------|--------------------|-----------|-------|--------------------|-----------|--------|
|                             | (170 assigned)     |            |                | (192 assigned) |           |       | (176 assigned)         |           |       | (224 assigned)     |           |       |                    |           |        |
|                             | Case               | No. of     | Incidence rate | No. of         | Incidence | Case  | No. of                 | Incidence | Case  | No. of             | Incidence |       |                    |           |        |
| times                       | cases              | Case times |                | cases          |           | rate  | times                  |           | cases | rate               |           | times | cases              | rate      |        |
| Total                       | 60                 | 35         | 20.59          | 67             | 39        | 20.31 | 78                     | 33        | 18.75 | 85                 | 43        | 19.20 | Chi-Square Test    | 0.267     | 0.9662 |
| Solicited event             | 27                 | 22         | 12.94          | 39             | 26        | 13.54 | 49                     | 24        | 13.64 | 45                 | 27        | 12.05 | Chi-Square Test    | 0.291     | 0.9617 |
| Local adverse events        | 5                  | 5          | 2.94           | 11             | 9         | 4.69  | 13                     | 10        | 5.68  | 17                 | 14        | 6.25  | Chi-Square Test    | 2.471     | 0.4805 |
| Soreness                    | 5                  | 5          | 2.94           | 8              | 7         | 3.65  | 8                      | 7         | 3.98  | 16                 | 13        | 5.80  | Chi-Square Test    | 2.270     | 0.5184 |
| Pruritus                    | 0                  | 0          | 0.00           | 0              | 0         | 0.00  | 1                      | 1         | 0.57  | 1                  | 1         | 0.45  | Fisher's Exact     | -         | 0.8517 |
| Systemic adverse events     | 22                 | 18         | 10.59          | 28             | 20        | 10.42 | 36                     | 15        | 8.52  | 28                 | 16        | 7.14  | Chi-Square Test    | 1.973     | 0.5781 |
| Dizziness                   | 9                  | 8          | 4.71           | 13             | 10        | 5.21  | 5                      | 4         | 2.27  | 7                  | 6         | 2.68  | Chi-Square Test    | 3.392     | 0.3351 |
| Fatigue/lethargy            | 7                  | 6          | 3.53           | 5              | 5         | 2.60  | 7                      | 5         | 2.84  | 6                  | 6         | 2.68  | Fisher's Exact     | -         | 0.9551 |
| Headache                    | 1                  | 1          | 0.59           | 2              | 2         | 1.04  | 6                      | 5         | 2.84  | 3                  | 3         | 1.34  | Fisher's Exact     | -         | 0.3842 |
| Non-injection site pruritus | 1                  | 1          | 0.59           | 0              | 0         | 0.00  | 1                      | 1         | 0.57  | 4                  | 2         | 0.89  | Fisher's Exact     | -         | 0.7886 |
| Muscle pain                 | 1                  | 1          | 0.59           | 2              | 2         | 1.04  | 0                      | 0         | 0.00  | 3                  | 2         | 0.89  | Fisher's Exact     | -         | 0.7310 |
| Nausea                      | 0                  | 0          | 0.00           | 1              | 1         | 0.52  | 3                      | 3         | 1.70  | 1                  | 1         | 0.45  | Fisher's Exact     | -         | 0.2929 |
| Chest tightness             | 0                  | 0          | 0.00           | 1              | 1         | 0.52  | 3                      | 3         | 1.70  | 1                  | 1         | 0.45  | Fisher's Exact     | -         | 0.2929 |
| Cough                       | 1                  | 1          | 0.59           | 1              | 1         | 0.52  | 2                      | 2         | 1.14  | 0                  | 0         | 0.00  | Fisher's Exact     | -         | 0.4191 |
| Vomiting                    | 1                  | 1          | 0.59           | 0              | 0         | 0.00  | 0                      | 0         | 0.00  | 1                  | 1         | 0.45  | Fisher's Exact     | -         | 0.7157 |
| Constipation                | 0                  | 0          | 0.00           | 0              | 0         | 0.00  | 0                      | 0         | 0.00  | 1                  | 1         | 0.45  | Fisher's Exact     | -         | 1.0000 |
| Anorexia                    | 0                  | 0          | 0.00           | 0              | 0         | 0.00  | 0                      | 0         | 0.00  | 1                  | 1         | 0.45  | Fisher's Exact     | -         | 1.0000 |

|                                                       |    |    |       |    |    |      |    |    |      |    |    |       |                        |       |        |
|-------------------------------------------------------|----|----|-------|----|----|------|----|----|------|----|----|-------|------------------------|-------|--------|
| Unsolicited event                                     | 33 | 21 | 12.35 | 28 | 17 | 8.85 | 29 | 16 | 9.09 | 40 | 23 | 10.27 | Chi-Square Test        | 1.482 | 0.6864 |
| Systemic disease and<br>administration site reactions | 5  | 4  | 2.35  | 9  | 4  | 2.08 | 8  | 6  | 3.41 | 5  | 3  | 1.34  | Fisher's Exact<br>Test | -     | 0.5695 |
| Gastrointestinal diseases                             | 2  | 2  | 1.18  | 4  | 3  | 1.56 | 4  | 2  | 1.14 | 7  | 3  | 1.34  | Fisher's Exact         | -     | 1.0000 |
| Musculoskeletal and<br>connective tissue disorders    | 1  | 1  | 0.59  | 2  | 2  | 1.04 | 7  | 5  | 2.84 | 5  | 4  | 1.79  | Fisher's Exact<br>Test | -     | 0.3713 |
| Neurological diseases                                 | 2  | 2  | 1.18  | 3  | 3  | 1.56 | 3  | 2  | 1.14 | 5  | 4  | 1.79  | Fisher's Exact         | -     | 0.9538 |
| Respiratory system, chest<br>and mediastinal diseases | 4  | 4  | 2.35  | 1  | 1  | 0.52 | 3  | 3  | 1.70 | 4  | 3  | 1.34  | Fisher's Exact<br>Test | -     | 0.4819 |
| Infections and infectious                             | 3  | 3  | 1.76  | 3  | 3  | 1.56 | 2  | 2  | 1.14 | 3  | 3  | 1.34  | Fisher's Exact         | -     | 0.9765 |
| Skin and subcutaneous<br>tissue diseases              | 2  | 1  | 0.59  | 1  | 1  | 0.52 | 0  | 0  | 0.00 | 3  | 3  | 1.34  | Fisher's Exact<br>Test | -     | 0.5063 |
| Injuries, poisoning and<br>operation complications    | 1  | 1  | 0.59  | 0  | 0  | 0.00 | 1  | 1  | 0.57 | 3  | 2  | 0.89  | Fisher's Exact<br>Test | -     | 0.7886 |
| Eye diseases                                          | 2  | 1  | 0.59  | 0  | 0  | 0.00 | 0  | 0  | 0.00 | 3  | 2  | 0.89  | Fisher's Exact         | -     | 0.5028 |
| Mental illness                                        | 0  | 0  | 0.00  | 0  | 0  | 0.00 | 0  | 0  | 0.00 | 1  | 1  | 0.45  | Fisher's Exact         | -     | 1.0000 |
| Blood and lymphatic<br>system diseases                | 0  | 0  | 0.00  | 0  | 0  | 0.00 | 0  | 0  | 0.00 | 1  | 1  | 0.45  | Fisher's Exact<br>Test | -     | 1.0000 |

\*Kruskal-Wallis test

**Table S3-1 Severity of adverse events 0-21 days after two doses of vaccine in the male**

| Adverse events          | Hypertension group<br>(157 assigned) |         |         | Diabetes group<br>(137 assigned) |         |         | Combined disease group<br>(120 assigned) |         |         | Healthy population<br>(256 assigned) |          |         | P*      |
|-------------------------|--------------------------------------|---------|---------|----------------------------------|---------|---------|------------------------------------------|---------|---------|--------------------------------------|----------|---------|---------|
|                         | Level 1                              | Level 2 | Level 3 | Level 1                          | Level 2 | Level 3 | Level 1                                  | Level 2 | Level 3 | Level 1                              | Level 2  | Level 3 |         |
| Total                   | 21(13.38)                            | 3(1.91) | 1(0.64) | 19(13.87)                        | 6(4.38) | 4(2.92) | 11(9.17)                                 | 6(5.00) | 3(2.50) | 22(8.59)                             | 13(5.08) | 3(1.17) | 0.4399  |
| Solicitation event      | 15(9.55)                             | 1(0.64) | 1(0.64) | 16(11.68)                        | 4(2.92) | 1(0.73) | 5(4.17)                                  | 2(1.67) | 1(0.83) | 12(4.69)                             | 2(0.78)  | 0(0.00) | 0.0070  |
| Local adverse events    | 8(5.10)                              | 0(0.00) | 0(0.00) | 9(6.57)                          | 0(0.00) | 0(0.00) | 2(1.67)                                  | 0(0.00) | 0(0.00) | 6(2.34)                              | 0(0.00)  | 0(0.00) | 0.0831  |
| Soreness                | 6(3.82)                              | 0(0.00) | 0(0.00) | 6(4.38)                          | 0(0.00) | 0(0.00) | 1(0.83)                                  | 0(0.00) | 0(0.00) | 6(2.34)                              | 0(0.00)  | 0(0.00) | 0.2952  |
| Pruritus                | 1(0.64)                              | 0(0.00) | 0(0.00) | 1(0.73)                          | 0(0.00) | 0(0.00) | 1(0.83)                                  | 0(0.00) | 0(0.00) | 0(0.00)                              | 0(0.00)  | 0(0.00) | 0.5893  |
| Swelling                | 0(0.00)                              | 0(0.00) | 0(0.00) | 2(1.46)                          | 0(0.00) | 0(0.00) | 0(0.00)                                  | 0(0.00) | 0(0.00) | 0(0.00)                              | 0(0.00)  | 0(0.00) | 0.0505  |
| Rash                    | 1(0.64)                              | 0(0.00) | 0(0.00) | 0(0.00)                          | 0(0.00) | 0(0.00) | 0(0.00)                                  | 0(0.00) | 0(0.00) | 0(0.00)                              | 0(0.00)  | 0(0.00) | 0.3522  |
| Systemic adverse events | 9(5.73)                              | 3(1.91) | 1(0.64) | 20(14.60)                        | 6(4.38) | 3(2.19) | 11(9.17)                                 | 3(2.50) | 4(3.33) | 14(5.47)                             | 2(0.78)  | 0(0.00) | <0.0001 |
| Dizziness               | 4(2.55)                              | 1(0.64) | 0(0.00) | 8(5.84)                          | 1(0.73) | 0(0.00) | 2(1.67)                                  | 1(0.83) | 0(0.00) | 6(2.34)                              | 0(0.00)  | 0(0.00) | 0.1504  |
| Fatigue/lethargy        | 1(0.64)                              | 0(0.00) | 0(0.00) | 2(1.46)                          | 1(0.73) | 1(0.73) | 1(0.83)                                  | 1(0.83) | 1(0.83) | 3(1.17)                              | 0(0.00)  | 0(0.00) | 0.3466  |
| Headache                | 2(1.27)                              | 0(0.00) | 0(0.00) | 3(2.19)                          | 1(0.73) | 1(0.73) | 2(1.67)                                  | 0(0.00) | 0(0.00) | 0(0.00)                              | 0(0.00)  | 0(0.00) | 0.0279  |
| Cough                   | 1(0.64)                              | 0(0.00) | 0(0.00) | 0(0.00)                          | 1(0.73) | 0(0.00) | 2(1.67)                                  | 0(0.00) | 1(0.83) | 1(0.39)                              | 1(0.39)  | 0(0.00) | 0.3901  |
| Nausea                  | 0(0.00)                              | 1(0.64) | 0(0.00) | 2(1.46)                          | 0(0.00) | 1(0.73) | 1(0.83)                                  | 0(0.00) | 0(0.00) | 0(0.00)                              | 0(0.00)  | 0(0.00) | 0.1214  |
| Chest tightness         | 1(0.64)                              | 0(0.00) | 0(0.00) | 3(2.19)                          | 0(0.00) | 0(0.00) | 1(0.83)                                  | 0(0.00) | 0(0.00) | 0(0.00)                              | 0(0.00)  | 0(0.00) | 0.1213  |
| Non-injection site      | 0(0.00)                              | 0(0.00) | 0(0.00) | 1(0.73)                          | 0(0.00) | 0(0.00) | 1(0.83)                                  | 1(0.83) | 0(0.00) | 0(0.00)                              | 0(0.00)  | 0(0.00) | 0.1069  |
| Arthralgia              | 0(0.00)                              | 1(0.64) | 0(0.00) | 0(0.00)                          | 0(0.00) | 0(0.00) | 0(0.00)                                  | 0(0.00) | 0(0.00) | 1(0.39)                              | 1(0.39)  | 0(0.00) | 0.5898  |
| Muscle pain             | 0(0.00)                              | 0(0.00) | 1(0.64) | 0(0.00)                          | 0(0.00) | 0(0.00) | 0(0.00)                                  | 0(0.00) | 0(0.00) | 2(0.78)                              | 0(0.00)  | 0(0.00) | 0.5900  |
| Diarrhea                | 0(0.00)                              | 0(0.00) | 0(0.00) | 0(0.00)                          | 1(0.73) | 0(0.00) | 0(0.00)                                  | 0(0.00) | 1(0.83) | 0(0.00)                              | 0(0.00)  | 0(0.00) | 0.3557  |
| Anorexia                | 0(0.00)                              | 0(0.00) | 0(0.00) | 0(0.00)                          | 1(0.73) | 0(0.00) | 0(0.00)                                  | 0(0.00) | 0(0.00) | 1(0.39)                              | 0(0.00)  | 0(0.00) | 0.6237  |

| Adverse events                                        | Hypertension group<br>(157 assigned) |         |         | Diabetes group<br>(137 assigned) |         |         | Combined disease group<br>(120 assigned) |         |         | Healthy population<br>(256 assigned) |          |         | P*     |
|-------------------------------------------------------|--------------------------------------|---------|---------|----------------------------------|---------|---------|------------------------------------------|---------|---------|--------------------------------------|----------|---------|--------|
|                                                       | Level 1                              | Level 2 | Level 3 | Level 1                          | Level 2 | Level 3 | Level 1                                  | Level 2 | Level 3 | Level 1                              | Level 2  | Level 3 |        |
| Constipation                                          | 0(0.00)                              | 0(0.00) | 0(0.00) | 0(0.00)                          | 0(0.00) | 0(0.00) | 1(0.83)                                  | 0(0.00) | 0(0.00) | 0(0.00)                              | 0(0.00)  | 0(0.00) | 0.2050 |
| Fever                                                 | 0(0.00)                              | 0(0.00) | 0(0.00) | 0(0.00)                          | 0(0.00) | 0(0.00) | 0(0.00)                                  | 0(0.00) | 1(0.83) | 0(0.00)                              | 0(0.00)  | 0(0.00) | 0.2050 |
| Skin mucosal                                          | 0(0.00)                              | 0(0.00) | 0(0.00) | 1(0.73)                          | 0(0.00) | 0(0.00) | 0(0.00)                                  | 0(0.00) | 0(0.00) | 0(0.00)                              | 0(0.00)  | 0(0.00) | 0.2735 |
| Unsolicited event                                     | 10(6.37)                             | 3(1.91) | 1(0.64) | 6(4.38)                          | 3(2.19) | 4(2.92) | 6(5.00)                                  | 6(5.00) | 3(2.50) | 16(6.25)                             | 11(4.30) | 3(1.17) | 0.6735 |
| Musculoskeletal and<br>connective tissue disorders    | 0(0.00)                              | 2(1.27) | 0(0.00) | 3(2.19)                          | 1(0.73) | 1(0.73) | 1(0.83)                                  | 3(2.50) | 1(0.83) | 4(1.56)                              | 3(1.17)  | 0(0.00) | 0.4744 |
| Gastrointestinal diseases                             | 0(0.00)                              | 0(0.00) | 0(0.00) | 2(1.46)                          | 2(1.46) | 0(0.00) | 1(0.83)                                  | 1(0.83) | 0(0.00) | 6(2.34)                              | 3(1.17)  | 1(0.39) | 0.0789 |
| Systemic disease and<br>administration site reactions | 2(1.27)                              | 0(0.00) | 0(0.00) | 3(2.19)                          | 2(1.46) | 1(0.73) | 2(1.67)                                  | 3(2.50) | 0(0.00) | 2(0.78)                              | 2(0.78)  | 0(0.00) | 0.1567 |
| Respiratory system, chest<br>and mediastinal diseases | 5(3.18)                              | 0(0.00) | 0(0.00) | 2(1.46)                          | 1(0.73) | 0(0.00) | 1(0.83)                                  | 0(0.00) | 0(0.00) | 3(1.17)                              | 0(0.00)  | 0(0.00) | 0.3862 |
| Neurological diseases                                 | 3(1.91)                              | 0(0.00) | 0(0.00) | 2(1.46)                          | 1(0.73) | 0(0.00) | 0(0.00)                                  | 0(0.00) | 2(1.67) | 3(1.17)                              | 1(0.39)  | 0(0.00) | 0.9747 |
| Metabolic and nutritional                             | 0(0.00)                              | 0(0.00) | 1(0.64) | 0(0.00)                          | 1(0.73) | 1(0.73) | 2(1.67)                                  | 0(0.00) | 0(0.00) | 0(0.00)                              | 0(0.00)  | 0(0.00) | 0.2364 |
| Kidney and urinary system                             | 0(0.00)                              | 0(0.00) | 0(0.00) | 0(0.00)                          | 0(0.00) | 1(0.73) | 0(0.00)                                  | 0(0.00) | 0(0.00) | 0(0.00)                              | 2(0.78)  | 3(1.17) | 0.1242 |
| Mental illness                                        | 0(0.00)                              | 0(0.00) | 0(0.00) | 0(0.00)                          | 0(0.00) | 0(0.00) | 0(0.00)                                  | 2(1.67) | 0(0.00) | 0(0.00)                              | 0(0.00)  | 0(0.00) | 0.0270 |
| Skin and subcutaneous<br>tissue diseases              | 2(1.27)                              | 1(0.64) | 0(0.00) | 0(0.00)                          | 0(0.00) | 0(0.00) | 0(0.00)                                  | 0(0.00) | 0(0.00) | 0(0.00)                              | 1(0.39)  | 0(0.00) | 0.0992 |
| Infections and infectious                             | 0(0.00)                              | 0(0.00) | 0(0.00) | 0(0.00)                          | 0(0.00) | 1(0.73) | 1(0.83)                                  | 0(0.00) | 1(0.83) | 0(0.00)                              | 0(0.00)  | 0(0.00) | 0.1075 |
| Injuries, poisoning and<br>operation complications    | 1(0.64)                              | 0(0.00) | 0(0.00) | 0(0.00)                          | 0(0.00) | 0(0.00) | 0(0.00)                                  | 0(0.00) | 0(0.00) | 0(0.00)                              | 0(0.00)  | 2(0.78) | 0.5892 |
| Reproductive system and<br>breast diseases            | 0(0.00)                              | 0(0.00) | 0(0.00) | 0(0.00)                          | 0(0.00) | 0(0.00) | 0(0.00)                                  | 0(0.00) | 0(0.00) | 0(0.00)                              | 1(0.39)  | 0(0.00) | 0.6555 |
| Heart diseases                                        | 0(0.00)                              | 0(0.00) | 0(0.00) | 0(0.00)                          | 0(0.00) | 0(0.00) | 0(0.00)                                  | 0(0.00) | 0(0.00) | 1(0.39)                              | 0(0.00)  | 0(0.00) | 0.6555 |

| Adverse events                      | Hypertension group |         |         | Diabetes group |         |         | Combined disease group |         |         | Healthy population |         |         | <i>P</i> * |
|-------------------------------------|--------------------|---------|---------|----------------|---------|---------|------------------------|---------|---------|--------------------|---------|---------|------------|
|                                     | (157 assigned)     |         |         | (137 assigned) |         |         | (120 assigned)         |         |         | (256 assigned)     |         |         |            |
|                                     | Level 1            | Level 2 | Level 3 | Level 1        | Level 2 | Level 3 | Level 1                | Level 2 | Level 3 | Level 1            | Level 2 | Level 3 |            |
| Blood and lymphatic system diseases | 0(0.00)            | 0(0.00) | 0(0.00) | 0(0.00)        | 0(0.00) | 1(0.73) | 0(0.00)                | 0(0.00) | 0(0.00) | 0(0.00)            | 0(0.00) | 0(0.00) | 0.2735     |

\*Kruskal-Wallis test

**Table S3-2 Severity of adverse events 0-21 days after two doses of vaccine in the female**

| Adverse events              | Hypertension group<br>(170 assigned) |         |         | Diabetes group<br>(192 assigned) |          |         | Combined disease group<br>(176 assigned) |          |         | Healthy population<br>(224 assigned) |          |         | <i>P</i> * |
|-----------------------------|--------------------------------------|---------|---------|----------------------------------|----------|---------|------------------------------------------|----------|---------|--------------------------------------|----------|---------|------------|
|                             | Level 1                              | Level 2 | Level 3 | Level 1                          | Level 2  | Level 3 | Level 1                                  | Level 2  | Level 3 | Level 1                              | Level 2  | Level 3 |            |
| Total                       | 24(14.12)                            | 6(3.53) | 5(2.94) | 27(14.06)                        | 12(6.25) | 0(0.00) | 20(11.36)                                | 10(5.68) | 3(1.70) | 31(13.84)                            | 10(4.46) | 2(0.89) | 0.9711     |
| Solicitation event          | 21(12.35)                            | 1(0.59) | 0(0.00) | 22(11.46)                        | 4(2.08)  | 0(0.00) | 17(9.66)                                 | 5(2.84)  | 2(1.14) | 25(11.16)                            | 2(0.89)  | 0(0.00) | 0.9384     |
| Local adverse events        | 5(2.94)                              | 0(0.00) | 0(0.00) | 9(4.69)                          | 1(0.52)  | 0(0.00) | 9(5.11)                                  | 2(1.14)  | 0(0.00) | 14(6.25)                             | 0(0.00)  | 0(0.00) | 0.4498     |
| Soreness                    | 5(2.94)                              | 0(0.00) | 0(0.00) | 7(3.65)                          | 0(0.00)  | 0(0.00) | 6(3.41)                                  | 1(0.57)  | 0(0.00) | 13(5.80)                             | 0(0.00)  | 0(0.00) | 0.5210     |
| Swelling                    | 0(0.00)                              | 0(0.00) | 0(0.00) | 2(1.04)                          | 1(0.52)  | 0(0.00) | 1(0.57)                                  | 1(0.57)  | 0(0.00) | 0(0.00)                              | 0(0.00)  | 0(0.00) | 0.1308     |
| Pruritus                    | 0(0.00)                              | 0(0.00) | 0(0.00) | 0(0.00)                          | 0(0.00)  | 0(0.00) | 1(0.57)                                  | 0(0.00)  | 0(0.00) | 1(0.45)                              | 0(0.00)  | 0(0.00) | 0.6002     |
| Hardness                    | 0(0.00)                              | 0(0.00) | 0(0.00) | 0(0.00)                          | 0(0.00)  | 0(0.00) | 1(0.57)                                  | 0(0.00)  | 0(0.00) | 0(0.00)                              | 0(0.00)  | 0(0.00) | 0.3436     |
| Systemic adverse events     | 19(11.18)                            | 1(0.59) | 0(0.00) | 21(10.94)                        | 4(2.08)  | 0(0.00) | 23(13.07)                                | 3(1.70)  | 4(2.27) | 21(9.38)                             | 3(1.34)  | 0(0.00) | 0.2442     |
| Dizziness                   | 8(4.71)                              | 0(0.00) | 0(0.00) | 9(4.69)                          | 1(0.52)  | 0(0.00) | 4(2.27)                                  | 0(0.00)  | 0(0.00) | 6(2.68)                              | 0(0.00)  | 0(0.00) | 0.3326     |
| Fatigue/lethargy            | 6(3.53)                              | 0(0.00) | 0(0.00) | 5(2.60)                          | 0(0.00)  | 0(0.00) | 4(2.27)                                  | 0(0.00)  | 1(0.57) | 5(2.23)                              | 1(0.45)  | 0(0.00) | 0.9535     |
| Headache                    | 1(0.59)                              | 0(0.00) | 0(0.00) | 1(0.52)                          | 1(0.52)  | 0(0.00) | 4(2.27)                                  | 0(0.00)  | 1(0.57) | 3(1.34)                              | 0(0.00)  | 0(0.00) | 0.3175     |
| Nausea                      | 0(0.00)                              | 0(0.00) | 0(0.00) | 1(0.52)                          | 0(0.00)  | 0(0.00) | 3(1.70)                                  | 0(0.00)  | 0(0.00) | 1(0.45)                              | 0(0.00)  | 0(0.00) | 0.2318     |
| Muscle pain                 | 1(0.59)                              | 0(0.00) | 0(0.00) | 2(1.04)                          | 0(0.00)  | 0(0.00) | 0(0.00)                                  | 0(0.00)  | 0(0.00) | 2(0.89)                              | 0(0.00)  | 0(0.00) | 0.6144     |
| Chest tightness             | 0(0.00)                              | 0(0.00) | 0(0.00) | 1(0.52)                          | 0(0.00)  | 0(0.00) | 3(1.70)                                  | 0(0.00)  | 0(0.00) | 1(0.45)                              | 0(0.00)  | 0(0.00) | 0.2318     |
| Non-injection site pruritus | 1(0.59)                              | 0(0.00) | 0(0.00) | 0(0.00)                          | 0(0.00)  | 0(0.00) | 1(0.57)                                  | 0(0.00)  | 0(0.00) | 1(0.45)                              | 1(0.45)  | 0(0.00) | 0.6562     |
| Arthralgia                  | 0(0.00)                              | 0(0.00) | 0(0.00) | 0(0.00)                          | 1(0.52)  | 0(0.00) | 2(1.14)                                  | 1(0.57)  | 0(0.00) | 0(0.00)                              | 0(0.00)  | 0(0.00) | 0.0804     |
| Cough                       | 0(0.00)                              | 1(0.59) | 0(0.00) | 1(0.52)                          | 0(0.00)  | 0(0.00) | 1(0.57)                                  | 1(0.57)  | 0(0.00) | 0(0.00)                              | 0(0.00)  | 0(0.00) | 0.4839     |
| Fever                       | 1(0.59)                              | 0(0.00) | 0(0.00) | 0(0.00)                          | 0(0.00)  | 0(0.00) | 1(0.57)                                  | 0(0.00)  | 1(0.57) | 0(0.00)                              | 0(0.00)  | 0(0.00) | 0.2326     |
| Diarrhea                    | 0(0.00)                              | 0(0.00) | 0(0.00) | 0(0.00)                          | 0(0.00)  | 0(0.00) | 0(0.00)                                  | 1(0.57)  | 1(0.57) | 0(0.00)                              | 0(0.00)  | 0(0.00) | 0.0833     |

[illegible]

| Adverse events                      | Hypertension group<br>(170 assigned) |         |         | Diabetes group<br>(192 assigned) |         |         | Combined disease group<br>(176 assigned) |         |         | Healthy population<br>(224 assigned) |         |         | <i>P</i> * |
|-------------------------------------|--------------------------------------|---------|---------|----------------------------------|---------|---------|------------------------------------------|---------|---------|--------------------------------------|---------|---------|------------|
|                                     | Level 1                              | Level 2 | Level 3 | Level 1                          | Level 2 | Level 3 | Level 1                                  | Level 2 | Level 3 | Level 1                              | Level 2 | Level 3 |            |
| Heart diseases                      | 1(0.59)                              | 0(0.00) | 0(0.00) | 0(0.00)                          | 0(0.00) | 0(0.00) | 0(0.00)                                  | 0(0.00) | 0(0.00) | 0(0.00)                              | 0(0.00) | 0(0.00) | 0.3231     |
| Vascular and Lymphatic Diseases     | 0(0.00)                              | 0(0.00) | 2(1.18) | 0(0.00)                          | 0(0.00) | 0(0.00) | 0(0.00)                                  | 0(0.00) | 0(0.00) | 0(0.00)                              | 0(0.00) | 0(0.00) | 0.0727     |
| Inspections                         | 1(0.59)                              | 0(0.00) | 0(0.00) | 0(0.00)                          | 0(0.00) | 0(0.00) | 0(0.00)                                  | 0(0.00) | 0(0.00) | 0(0.00)                              | 0(0.00) | 0(0.00) | 0.3231     |
| Mental illness                      | 0(0.00)                              | 0(0.00) | 0(0.00) | 0(0.00)                          | 0(0.00) | 0(0.00) | 0(0.00)                                  | 0(0.00) | 0(0.00) | 1(0.45)                              | 0(0.00) | 0(0.00) | 0.4933     |
| Blood and lymphatic system diseases | 0(0.00)                              | 0(0.00) | 0(0.00) | 0(0.00)                          | 0(0.00) | 0(0.00) | 0(0.00)                                  | 0(0.00) | 0(0.00) | 0(0.00)                              | 0(0.00) | 1(0.45) | 0.4933     |

\*Kruskal-Wallis test

**Table S4-1 Adverse events 0-21 days after two doses of vaccine in people aged 60-69**

| Adverse events          | Hypertension group<br>(228 assigned) |                 |                   | Diabetes group<br>(233 assigned) |                 |                   | Combined disease group<br>(204 assigned) |                 |                   | Healthy population<br>(337 assigned) |                 |                   | Statistical method     | Statistic | P*     |
|-------------------------|--------------------------------------|-----------------|-------------------|----------------------------------|-----------------|-------------------|------------------------------------------|-----------------|-------------------|--------------------------------------|-----------------|-------------------|------------------------|-----------|--------|
|                         | Case<br>times                        | No. of<br>cases | Incidence<br>rate | Case<br>times                    | No. of<br>cases | Incidence<br>rate | Case<br>times                            | No. of<br>cases | Incidence<br>rate | Case<br>times                        | No. of<br>cases | Incidence<br>rate |                        |           |        |
| Total                   | 80                                   | 49              | 21.49             | 74                               | 36              | 15.45             | 101                                      | 36              | 17.65             | 127                                  | 60              | 17.80             | Chi-Square Test        | 2.924     | 0.4035 |
| Solicited event         | 35                                   | 29              | 12.72             | 41                               | 24              | 10.30             | 61                                       | 26              | 12.75             | 58                                   | 34              | 10.09             | Chi-Square Test        | 1.611     | 0.6569 |
| Local adverse events    | 11                                   | 11              | 4.82              | 12                               | 10              | 4.29              | 13                                       | 10              | 4.90              | 20                                   | 17              | 5.04              | Chi-Square Test        | 0.181     | 0.9806 |
| Soreness                | 9                                    | 9               | 3.95              | 9                                | 8               | 3.43              | 8                                        | 7               | 3.43              | 19                                   | 16              | 4.75              | Chi-Square Test        | 0.860     | 0.8350 |
| Swelling                | 0                                    | 0               | 0.00              | 3                                | 3               | 1.29              | 3                                        | 2               | 0.98              | 0                                    | 0               | 0.00              | Fisher's Exact<br>Test | -         | 0.0526 |
| Pruritus                | 1                                    | 1               | 0.44              | 0                                | 0               | 0.00              | 1                                        | 1               | 0.49              | 1                                    | 1               | 0.30              | Fisher's Exact<br>Test | -         | 0.7971 |
| Rash                    | 1                                    | 1               | 0.44              | 0                                | 0               | 0.00              | 0                                        | 0               | 0.00              | 0                                    | 0               | 0.00              | Fisher's Exact<br>Test | -         | 0.4311 |
| Hardness                | 0                                    | 0               | 0.00              | 0                                | 0               | 0.00              | 1                                        | 1               | 0.49              | 0                                    | 0               | 0.00              | Fisher's Exact<br>Test | -         | 0.2036 |
| Systemic adverse events | 24                                   | 20              | 8.77              | 29                               | 19              | 8.15              | 48                                       | 18              | 8.82              | 38                                   | 22              | 6.53              | Chi-Square Test        | 1.372     | 0.7121 |
| Dizziness               | 7                                    | 6               | 2.63              | 11                               | 9               | 3.86              | 8                                        | 7               | 3.43              | 12                                   | 10              | 2.97              | Chi-Square Test        | 0.663     | 0.8818 |
| Fatigue/lethargy        | 6                                    | 6               | 2.63              | 6                                | 6               | 2.58              | 9                                        | 7               | 3.43              | 7                                    | 7               | 2.08              | Chi-Square Test        | 0.924     | 0.8197 |
| Headache                | 2                                    | 2               | 0.88              | 1                                | 1               | 0.43              | 8                                        | 7               | 3.43              | 3                                    | 3               | 0.89              | Fisher's Exact<br>Test | -         | 0.0486 |
| Nausea                  | 1                                    | 1               | 0.44              | 3                                | 3               | 1.29              | 4                                        | 4               | 1.96              | 1                                    | 1               | 0.30              | Fisher's Exact<br>Test | -         | 0.1586 |
| Chest tightness         | 1                                    | 1               | 0.44              | 4                                | 3               | 1.29              | 3                                        | 3               | 1.47              | 1                                    | 1               | 0.30              | Fisher's Exact<br>Test | -         | 0.3446 |

| Adverse events                                     | Hypertension group<br>(228 assigned) |                 |                   | Diabetes group<br>(233 assigned) |                 |                   | Combined disease group<br>(204 assigned) |                 |                   | Healthy population<br>(337 assigned) |                 |                   | Statistical method     | Statistic | <i>P</i> * |
|----------------------------------------------------|--------------------------------------|-----------------|-------------------|----------------------------------|-----------------|-------------------|------------------------------------------|-----------------|-------------------|--------------------------------------|-----------------|-------------------|------------------------|-----------|------------|
|                                                    | Case<br>times                        | No. of<br>cases | Incidence<br>rate | Case<br>times                    | No. of<br>cases | Incidence<br>rate | Case<br>times                            | No. of<br>cases | Incidence<br>rate | Case<br>times                        | No. of<br>cases | Incidence<br>rate |                        |           |            |
| Muscle pain                                        | 2                                    | 2               | 0.88              | 2                                | 2               | 0.86              | 0                                        | 0               | 0.00              | 4                                    | 3               | 0.89              | Fisher's Exact<br>Test | -         | 0.6631     |
| Cough                                              | 2                                    | 2               | 0.88              | 0                                | 0               | 0.00              | 5                                        | 5               | 2.45              | 1                                    | 1               | 0.30              | Fisher's Exact<br>Test | -         | 0.0163     |
| Non-injection site pruritus                        | 1                                    | 1               | 0.44              | 0                                | 0               | 0.00              | 1                                        | 1               | 0.49              | 4                                    | 2               | 0.59              | Fisher's Exact<br>Test | -         | 0.7760     |
| Arthralgia                                         | 1                                    | 1               | 0.44              | 0                                | 0               | 0.00              | 4                                        | 2               | 0.98              | 1                                    | 1               | 0.30              | Fisher's Exact<br>Test | -         | 0.4885     |
| Fever                                              | 0                                    | 0               | 0.00              | 0                                | 0               | 0.00              | 3                                        | 3               | 1.47              | 0                                    | 0               | 0.00              | Fisher's Exact<br>Test | -         | 0.0083     |
| Diarrhea                                           | 0                                    | 0               | 0.00              | 0                                | 0               | 0.00              | 3                                        | 3               | 1.47              | 0                                    | 0               | 0.00              | Fisher's Exact<br>Test | -         | 0.0083     |
| Anorexia                                           | 0                                    | 0               | 0.00              | 1                                | 1               | 0.43              | 0                                        | 0               | 0.00              | 2                                    | 2               | 0.59              | Fisher's Exact<br>Test | -         | 0.7033     |
| Vomiting                                           | 1                                    | 1               | 0.44              | 0                                | 0               | 0.00              | 0                                        | 0               | 0.00              | 1                                    | 1               | 0.30              | Fisher's Exact<br>Test | -         | 0.8434     |
| Constipation                                       | 0                                    | 0               | 0.00              | 0                                | 0               | 0.00              | 0                                        | 0               | 0.00              | 1                                    | 1               | 0.30              | Fisher's Exact<br>Test | -         | 1.0000     |
| skin and mucous membrane<br>abnormalities          | 0                                    | 0               | 0.00              | 1                                | 1               | 0.43              | 0                                        | 0               | 0.00              | 0                                    | 0               | 0.00              | Fisher's Exact<br>Test | -         | 0.6637     |
| Non-solicited event                                | 45                                   | 30              | 13.16             | 33                               | 15              | 6.44              | 40                                       | 17              | 8.33              | 69                                   | 38              | 11.28             | Chi-Square Test        | 7.063     | 0.0699     |
| Musculoskeletal and connective tissue<br>disorders | 3                                    | 3               | 1.32              | 4                                | 1               | 0.43              | 8                                        | 5               | 2.45              | 16                                   | 8               | 2.37              | Fisher's Exact<br>Test | -         | 0.2236     |
| Gastrointestinal diseases                          | 2                                    | 2               | 0.88              | 8                                | 4               | 1.72              | 5                                        | 3               | 1.47              | 15                                   | 8               | 2.37              | Fisher's Exact<br>Test | -         | 0.6359     |

| Adverse events                                     | Hypertension group<br>(228 assigned) |                 |                   | Diabetes group<br>(233 assigned) |                 |                   | Combined disease group<br>(204 assigned) |                 |                   | Healthy population<br>(337 assigned) |                 |                   | Statistical method  | Statistic | <i>P</i> * |
|----------------------------------------------------|--------------------------------------|-----------------|-------------------|----------------------------------|-----------------|-------------------|------------------------------------------|-----------------|-------------------|--------------------------------------|-----------------|-------------------|---------------------|-----------|------------|
|                                                    | Case<br>times                        | No. of<br>cases | Incidence<br>rate | Case<br>times                    | No. of<br>cases | Incidence<br>rate | Case<br>times                            | No. of<br>cases | Incidence<br>rate | Case<br>times                        | No. of<br>cases | Incidence<br>rate |                     |           |            |
| Systemic disease and administration site reactions | 7                                    | 6               | 2.63              | 7                                | 5               | 2.15              | 8                                        | 6               | 2.94              | 6                                    | 4               | 1.19              | Fisher's Exact Test | -         | 0.4410     |
| respiratory, chest and mediastinal diseases        | 9                                    | 8               | 3.51              | 3                                | 2               | 0.86              | 2                                        | 2               | 0.98              | 6                                    | 4               | 1.19              | Fisher's Exact Test | -         | 0.1219     |
| Neurological diseases                              | 4                                    | 4               | 1.75              | 3                                | 3               | 1.29              | 4                                        | 3               | 1.47              | 5                                    | 4               | 1.19              | Fisher's Exact Test | -         | 0.9498     |
| Infections and infectious diseases                 | 2                                    | 2               | 0.88              | 3                                | 3               | 1.29              | 4                                        | 4               | 1.96              | 3                                    | 3               | 0.89              | Fisher's Exact Test | -         | 0.7086     |
| Skin and subcutaneous tissue diseases              | 4                                    | 3               | 1.32              | 1                                | 1               | 0.43              | 0                                        | 0               | 0.00              | 4                                    | 4               | 1.19              | Fisher's Exact Test | -         | 0.3919     |
| Metabolic and nutritional diseases                 | 2                                    | 2               | 0.88              | 2                                | 2               | 0.86              | 4                                        | 2               | 0.98              | 0                                    | 0               | 0.00              | Fisher's Exact Test | -         | 0.2313     |
| Kidney and urinary system diseases                 | 3                                    | 3               | 1.32              | 1                                | 1               | 0.43              | 0                                        | 0               | 0.00              | 4                                    | 2               | 0.59              | Fisher's Exact Test | -         | 0.4000     |
| Injury, poisoning, and operation complications     | 1                                    | 1               | 0.44              | 0                                | 0               | 0.00              | 0                                        | 0               | 0.00              | 5                                    | 3               | 0.89              | Fisher's Exact Test | -         | 0.3433     |
| Mental illness                                     | 0                                    | 0               | 0.00              | 0                                | 0               | 0.00              | 4                                        | 1               | 0.49              | 1                                    | 1               | 0.30              | Fisher's Exact Test | -         | 0.6902     |
| Eye diseases                                       | 2                                    | 1               | 0.44              | 0                                | 0               | 0.00              | 0                                        | 0               | 0.00              | 2                                    | 1               | 0.30              | Fisher's Exact Test | -         | 0.8434     |
| heart diseases                                     | 2                                    | 1               | 0.44              | 0                                | 0               | 0.00              | 0                                        | 0               | 0.00              | 1                                    | 1               | 0.30              | Fisher's Exact Test | -         | 0.8434     |
| Vascular and lymphatic diseases                    | 2                                    | 2               | 0.88              | 1                                | 1               | 0.43              | 0                                        | 0               | 0.00              | 0                                    | 0               | 0.00              | Fisher's Exact Test | -         | 0.1902     |

| Adverse events                           | Hypertension group<br>(228 assigned) |                 |                   | Diabetes group<br>(233 assigned) |                 |                   | Combined disease group<br>(204 assigned) |                 |                   | Healthy population<br>(337 assigned) |                 |                   | Statistical method  | Statistic | <i>P</i> * |
|------------------------------------------|--------------------------------------|-----------------|-------------------|----------------------------------|-----------------|-------------------|------------------------------------------|-----------------|-------------------|--------------------------------------|-----------------|-------------------|---------------------|-----------|------------|
|                                          | Case<br>times                        | No. of<br>cases | Incidence<br>rate | Case<br>times                    | No. of<br>cases | Incidence<br>rate | Case<br>times                            | No. of<br>cases | Incidence<br>rate | Case<br>times                        | No. of<br>cases | Incidence<br>rate |                     |           |            |
| Benign, malignant and unspecified tumors | 2                                    | 1               | 0.44              | 0                                | 0               | 0.00              | 0                                        | 0               | 0.00              | 0                                    | 0               | 0.00              | Fisher's Exact Test | -         | 0.4311     |
| Hepatobiliary diseases                   | 0                                    | 0               | 0.00              | 0                                | 0               | 0.00              | 1                                        | 1               | 0.49              | 0                                    | 0               | 0.00              | Fisher's Exact Test | -         | 0.2036     |
| Blood and lymphatic system diseases      | 0                                    | 0               | 0.00              | 0                                | 0               | 0.00              | 0                                        | 0               | 0.00              | 1                                    | 1               | 0.30              | Fisher's Exact Test | -         | 1.0000     |

\*Kruskal-Wallis test

**Table S4-2 Adverse events 0-21 days after two doses of vaccine in people aged 70 and above**

| Adverse events              | Hypertension group<br>(99 assigned)) |              |                | Diabetes group<br>(96 assigned)) |              |                | Combined disease group<br>(92 assigned)) |              |                | Healthy population<br>(143 assigned)) |              |                | Statistical method  | Statistic | P*      |
|-----------------------------|--------------------------------------|--------------|----------------|----------------------------------|--------------|----------------|------------------------------------------|--------------|----------------|---------------------------------------|--------------|----------------|---------------------|-----------|---------|
|                             | Case times                           | No. of cases | Incidence rate | Case times                       | No. of cases | Incidence rate | Case times                               | No. of cases | Incidence rate | Case times                            | No. of cases | Incidence rate |                     |           |         |
| Total                       | 19                                   | 11           | 11.11          | 70                               | 32           | 33.33          | 31                                       | 17           | 18.48          | 38                                    | 21           | 14.69          | Chi-Square Test     | 18.680    | 0.0003  |
| Solicited event             | 14                                   | 10           | 10.10          | 41                               | 23           | 23.96          | 8                                        | 6            | 6.52           | 12                                    | 7            | 4.90           | Chi-Square Test     | 24.427    | <0.0001 |
| Local adverse events        | 2                                    | 2            | 2.02           | 9                                | 8            | 8.33           | 2                                        | 2            | 2.17           | 4                                     | 3            | 2.10           | Fisher's Exact Test | -         | 0.0699  |
| Soreness                    | 2                                    | 2            | 2.02           | 6                                | 5            | 5.21           | 1                                        | 1            | 1.09           | 4                                     | 3            | 2.10           | Fisher's Exact Test | -         | 0.3810  |
| Swelling                    | 0                                    | 0            | 0.00           | 2                                | 2            | 2.08           | 0                                        | 0            | 0.00           | 0                                     | 0            | 0.00           | Fisher's Exact Test | -         | 0.0948  |
| Pruritus                    | 0                                    | 0            | 0.00           | 1                                | 1            | 1.04           | 1                                        | 1            | 1.09           | 0                                     | 0            | 0.00           | Fisher's Exact Test | -         | 0.2432  |
| Systemic adverse events     | 12                                   | 8            | 8.08           | 32                               | 16           | 16.67          | 6                                        | 5            | 5.43           | 8                                     | 4            | 2.80           | Chi-Square Test     | 16.431    | 0.0009  |
| Dizziness                   | 8                                    | 7            | 7.07           | 14                               | 10           | 10.42          | 0                                        | 0            | 0.00           | 3                                     | 2            | 1.40           | Fisher's Exact Test | -         | 0.0003  |
| Fatigue/lethargy            | 2                                    | 1            | 1.01           | 3                                | 3            | 3.13           | 1                                        | 1            | 1.09           | 2                                     | 2            | 1.40           | Fisher's Exact Test | -         | 0.6869  |
| Headache                    | 1                                    | 1            | 1.01           | 6                                | 6            | 6.25           | 0                                        | 0            | 0.00           | 0                                     | 0            | 0.00           | Fisher's Exact Test | -         | 0.0007  |
| Non-injection site pruritus | 0                                    | 0            | 0.00           | 1                                | 1            | 1.04           | 2                                        | 2            | 2.17           | 0                                     | 0            | 0.00           | Fisher's Exact Test | -         | 0.0629  |
| Arthralgia                  | 0                                    | 0            | 0.00           | 1                                | 1            | 1.04           | 1                                        | 1            | 1.09           | 1                                     | 1            | 0.70           | Fisher's Exact Test | -         | 0.7977  |

| Adverse events                                     | Hypertension group<br>(99 assigned)) |                 |                   | Diabetes group<br>(96 assigned)) |                 |                   | Combined disease group<br>(92 assigned)) |                 |                   | Healthy population<br>(143 assigned)) |                 |                   | Statistical method     | Statistic | <i>P</i> * |
|----------------------------------------------------|--------------------------------------|-----------------|-------------------|----------------------------------|-----------------|-------------------|------------------------------------------|-----------------|-------------------|---------------------------------------|-----------------|-------------------|------------------------|-----------|------------|
|                                                    | Case<br>times                        | No. of<br>cases | Incidence<br>rate | Case<br>times                    | No. of<br>cases | Incidence<br>rate | Case<br>times                            | No. of<br>cases | Incidence<br>rate | Case<br>times                         | No. of<br>cases | Incidence<br>rate |                        |           |            |
| Cough                                              | 0                                    | 0               | 0.00              | 2                                | 2               | 2.08              | 0                                        | 0               | 0.00              | 1                                     | 1               | 0.70              | Fisher's Exact<br>Test | -         | 0.3612     |
| Skin mucosal abnormalities                         | 0                                    | 0               | 0.00              | 2                                | 2               | 2.08              | 0                                        | 0               | 0.00              | 0                                     | 0               | 0.00              | Fisher's Exact<br>Test | -         | 0.0948     |
| Chest tightness                                    | 0                                    | 0               | 0.00              | 1                                | 1               | 1.04              | 1                                        | 1               | 1.09              | 0                                     | 0               | 0.00              | Fisher's Exact<br>Test | -         | 0.2432     |
| Constipation                                       | 0                                    | 0               | 0.00              | 0                                | 0               | 0.00              | 1                                        | 1               | 1.09              | 0                                     | 0               | 0.00              | Fisher's Exact<br>Test | -         | 0.2140     |
| Nausea                                             | 0                                    | 0               | 0.00              | 1                                | 1               | 1.04              | 0                                        | 0               | 0.00              | 0                                     | 0               | 0.00              | Fisher's Exact<br>Test | -         | 0.4372     |
| Fever                                              | 1                                    | 1               | 1.01              | 0                                | 0               | 0.00              | 0                                        | 0               | 0.00              | 0                                     | 0               | 0.00              | Fisher's Exact<br>Test | -         | 0.6674     |
| Diarrhea                                           | 0                                    | 0               | 0.00              | 1                                | 1               | 1.04              | 0                                        | 0               | 0.00              | 0                                     | 0               | 0.00              | Fisher's Exact<br>Test | -         | 0.4372     |
| Muscle pain                                        | 0                                    | 0               | 0.00              | 0                                | 0               | 0.00              | 0                                        | 0               | 0.00              | 1                                     | 1               | 0.70              | Fisher's Exact<br>Test | -         | 1.0000     |
| Non-solicited event                                | 5                                    | 5               | 5.05              | 29                               | 15              | 15.63             | 23                                       | 14              | 15.22             | 26                                    | 15              | 10.49             | Chi-Square Test        | 7.095     | 0.0689     |
| Musculoskeletal and connective tissue disorders    | 0                                    | 0               | 0.00              | 7                                | 5               | 5.21              | 12                                       | 4               | 4.35              | 3                                     | 2               | 1.40              | Fisher's Exact<br>Test | -         | 0.0437     |
| Systemic disease and administration site reactions | 0                                    | 0               | 0.00              | 9                                | 5               | 5.21              | 5                                        | 5               | 5.43              | 4                                     | 2               | 1.40              | Fisher's Exact<br>Test | -         | 0.0235     |
| Gastrointestinal diseases                          | 0                                    | 0               | 0.00              | 3                                | 3               | 3.13              | 2                                        | 1               | 1.09              | 8                                     | 4               | 2.80              | Fisher's Exact<br>Test | -         | 0.3069     |
| Neurological diseases                              | 1                                    | 1               | 1.01              | 3                                | 2               | 2.08              | 1                                        | 1               | 1.09              | 4                                     | 4               | 2.80              | Fisher's Exact<br>Test | -         | 0.8358     |

| Adverse events                                 | Hypertension group<br>(99 assigned)) |                 |                   | Diabetes group<br>(96 assigned)) |                 |                   | Combined disease group<br>(92 assigned)) |                 |                   | Healthy population<br>(143 assigned)) |                 |                   | Statistical method  | Statistic | <i>P</i> * |
|------------------------------------------------|--------------------------------------|-----------------|-------------------|----------------------------------|-----------------|-------------------|------------------------------------------|-----------------|-------------------|---------------------------------------|-----------------|-------------------|---------------------|-----------|------------|
|                                                | Case<br>times                        | No. of<br>cases | Incidence<br>rate | Case<br>times                    | No. of<br>cases | Incidence<br>rate | Case<br>times                            | No. of<br>cases | Incidence<br>rate | Case<br>times                         | No. of<br>cases | Incidence<br>rate |                     |           |            |
| respiratory, chest and mediastinal diseases    | 0                                    | 0               | 0.00              | 1                                | 1               | 1.04              | 2                                        | 2               | 2.17              | 2                                     | 2               | 1.40              | Fisher's Exact Test | -         | 0.4816     |
| Hepatobiliary diseases                         | 0                                    | 0               | 0.00              | 4                                | 1               | 1.04              | 0                                        | 0               | 0.00              | 0                                     | 0               | 0.00              | Fisher's Exact Test | -         | 0.4372     |
| Infections and infectious diseases             | 1                                    | 1               | 1.01              | 1                                | 1               | 1.04              | 0                                        | 0               | 0.00              | 0                                     | 0               | 0.00              | Fisher's Exact Test | -         | 0.4450     |
| Injury, poisoning, and operation complications | 1                                    | 1               | 1.01              | 0                                | 0               | 0.00              | 1                                        | 1               | 1.09              | 0                                     | 0               | 0.00              | Fisher's Exact Test | -         | 0.3419     |
| Kidney and urinary system diseases             | 0                                    | 0               | 0.00              | 0                                | 0               | 0.00              | 0                                        | 0               | 0.00              | 2                                     | 2               | 1.40              | Fisher's Exact Test | -         | 0.5550     |
| Reproductive system and breast diseases        | 0                                    | 0               | 0.00              | 0                                | 0               | 0.00              | 0                                        | 0               | 0.00              | 2                                     | 1               | 0.70              | Fisher's Exact Test | -         | 1.0000     |
| Metabolic and nutritional diseases             | 0                                    | 0               | 0.00              | 1                                | 1               | 1.04              | 0                                        | 0               | 0.00              | 0                                     | 0               | 0.00              | Fisher's Exact Test | -         | 0.4372     |
| Various inspections                            | 1                                    | 1               | 1.01              | 0                                | 0               | 0.00              | 0                                        | 0               | 0.00              | 0                                     | 0               | 0.00              | Fisher's Exact Test | -         | 0.6674     |
| Skin and subcutaneous tissue diseases          | 1                                    | 1               | 1.01              | 0                                | 0               | 0.00              | 0                                        | 0               | 0.00              | 0                                     | 0               | 0.00              | Fisher's Exact Test | -         | 0.6674     |
| Eye diseases                                   | 0                                    | 0               | 0.00              | 0                                | 0               | 0.00              | 0                                        | 0               | 0.00              | 1                                     | 1               | 0.70              | Fisher's Exact Test | -         | 1.0000     |

\*Kruskal-Wallis test

**Table S5-1 Severity of adverse events 0-21 days after two doses of vaccine in people aged 60-69**

| Adverse events          | Hypertension group<br>(228 assigned) |         |         | Diabetes group<br>(233 assigned) |         |         | Combined disease group<br>(204 assigned) |         |         | Healthy population<br>(337 assigned) |         |         | <i>P</i> * |
|-------------------------|--------------------------------------|---------|---------|----------------------------------|---------|---------|------------------------------------------|---------|---------|--------------------------------------|---------|---------|------------|
|                         | Level 1                              | Level 2 | Level 3 | Level 1                          | Level 2 | Level 3 | Level 1                                  | Level 2 | Level 3 | Level 1                              | Level 2 | Level 3 |            |
| Total                   | 27(11.84)                            | 2(0.88) | 1(0.44) | 19(8.15)                         | 3(1.29) | 1(0.43) | 21(10.29)                                | 5(2.45) | 3(1.47) | 31(9.20)                             | 5(1.48) | 0(0.00) | 0.4019     |
| Solicited event         | 24(10.53)                            | 1(0.44) | 1(0.44) | 18(7.73)                         | 1(0.43) | 1(0.43) | 18(8.82)                                 | 4(1.96) | 2(0.98) | 30(8.90)                             | 1(0.30) | 0(0.00) | 0.5514     |
| Local adverse events    | 11(4.82)                             | 0(0.00) | 0(0.00) | 10(4.29)                         | 1(0.43) | 0(0.00) | 9(4.41)                                  | 2(0.98) | 0(0.00) | 17(5.04)                             | 0(0.00) | 0(0.00) | 0.9878     |
| Soreness                | 9(3.95)                              | 0(0.00) | 0(0.00) | 8(3.43)                          | 0(0.00) | 0(0.00) | 6(2.94)                                  | 1(0.49) | 0(0.00) | 16(4.75)                             | 0(0.00) | 0(0.00) | 0.8384     |
| Swelling                | 0(0.00)                              | 0(0.00) | 0(0.00) | 2(0.86)                          | 1(0.43) | 0(0.00) | 1(0.49)                                  | 1(0.49) | 0(0.00) | 0(0.00)                              | 0(0.00) | 0(0.00) | 0.0823     |
| Pruritus                | 1(0.44)                              | 0(0.00) | 0(0.00) | 0(0.00)                          | 0(0.00) | 0(0.00) | 1(0.49)                                  | 0(0.00) | 0(0.00) | 1(0.30)                              | 0(0.00) | 0(0.00) | 0.7782     |
| Rash                    | 1(0.44)                              | 0(0.00) | 0(0.00) | 0(0.00)                          | 0(0.00) | 0(0.00) | 0(0.00)                                  | 0(0.00) | 0(0.00) | 0(0.00)                              | 0(0.00) | 0(0.00) | 0.3347     |
| Hardness                | 0(0.00)                              | 0(0.00) | 0(0.00) | 0(0.00)                          | 0(0.00) | 0(0.00) | 1(0.49)                                  | 0(0.00) | 0(0.00) | 0(0.00)                              | 0(0.00) | 0(0.00) | 0.2712     |
| Systemic adverse events | 16(7.02)                             | 3(1.32) | 1(0.44) | 17(7.30)                         | 1(0.43) | 3(1.29) | 27(13.24)                                | 3(1.47) | 7(3.43) | 27(8.01)                             | 2(0.59) | 0(0.00) | 0.0013     |
| Dizziness               | 5(2.19)                              | 1(0.44) | 0(0.00) | 7(3.00)                          | 0(0.00) | 0(0.00) | 6(2.94)                                  | 1(0.49) | 0(0.00) | 9(2.67)                              | 0(0.00) | 0(0.00) | 0.9524     |
| Fatigue/lethargy        | 6(2.63)                              | 0(0.00) | 0(0.00) | 5(2.15)                          | 0(0.00) | 1(0.43) | 4(1.96)                                  | 1(0.49) | 2(0.98) | 6(1.78)                              | 0(0.00) | 0(0.00) | 0.6795     |
| Headache                | 1(0.44)                              | 0(0.00) | 0(0.00) | 0(0.00)                          | 0(0.00) | 1(0.43) | 6(2.94)                                  | 0(0.00) | 0(0.00) | 3(0.89)                              | 0(0.00) | 0(0.00) | 0.0393     |
| Nausea                  | 0(0.00)                              | 1(0.44) | 0(0.00) | 1(0.43)                          | 0(0.00) | 1(0.43) | 4(1.96)                                  | 0(0.00) | 0(0.00) | 1(0.30)                              | 0(0.00) | 0(0.00) | 0.1789     |
| Chest tightness         | 1(0.44)                              | 0(0.00) | 0(0.00) | 3(1.29)                          | 0(0.00) | 0(0.00) | 3(1.47)                                  | 0(0.00) | 0(0.00) | 1(0.30)                              | 0(0.00) | 0(0.00) | 0.3466     |

| Adverse events                                     | Hypertension group<br>(228 assigned) |         |         | Diabetes group<br>(233 assigned) |         |         | Combined disease group<br>(204 assigned) |         |         | Healthy population<br>(337 assigned) |         |         | <i>P</i> * |
|----------------------------------------------------|--------------------------------------|---------|---------|----------------------------------|---------|---------|------------------------------------------|---------|---------|--------------------------------------|---------|---------|------------|
|                                                    | Level 1                              | Level 2 | Level 3 | Level 1                          | Level 2 | Level 3 | Level 1                                  | Level 2 | Level 3 | Level 1                              | Level 2 | Level 3 |            |
| Muscle pain                                        | 1(0.44)                              | 0(0.00) | 1(0.44) | 1(0.43)                          | 0(0.00) | 0(0.00) | 0(0.00)                                  | 0(0.00) | 0(0.00) | 2(0.59)                              | 0(0.00) | 0(0.00) | 0.6224     |
| Non-injection site pruritus                        | 1(0.44)                              | 0(0.00) | 0(0.00) | 0(0.00)                          | 0(0.00) | 0(0.00) | 1(0.49)                                  | 0(0.00) | 0(0.00) | 1(0.30)                              | 1(0.30) | 0(0.00) | 0.7279     |
| Cough                                              | 0(0.00)                              | 0(0.00) | 0(0.00) | 0(0.00)                          | 0(0.00) | 0(0.00) | 1(0.49)                                  | 1(0.49) | 1(0.49) | 1(0.30)                              | 0(0.00) | 0(0.00) | 0.0497     |
| Fever                                              | 0(0.00)                              | 0(0.00) | 0(0.00) | 0(0.00)                          | 0(0.00) | 0(0.00) | 1(0.49)                                  | 0(0.00) | 2(0.98) | 0(0.00)                              | 0(0.00) | 0(0.00) | 0.0083     |
| Anorexia                                           | 0(0.00)                              | 0(0.00) | 0(0.00) | 0(0.00)                          | 1(0.43) | 0(0.00) | 0(0.00)                                  | 0(0.00) | 0(0.00) | 2(0.59)                              | 0(0.00) | 0(0.00) | 0.4935     |
| Diarrhea                                           | 0(0.00)                              | 0(0.00) | 0(0.00) | 0(0.00)                          | 0(0.00) | 0(0.00) | 0(0.00)                                  | 0(0.00) | 2(0.98) | 0(0.00)                              | 0(0.00) | 0(0.00) | 0.0496     |
| Arthralgia                                         | 0(0.00)                              | 1(0.44) | 0(0.00) | 0(0.00)                          | 0(0.00) | 0(0.00) | 1(0.49)                                  | 0(0.00) | 0(0.00) | 0(0.00)                              | 0(0.00) | 0(0.00) | 0.4479     |
| Vomiting                                           | 1(0.44)                              | 0(0.00) | 0(0.00) | 0(0.00)                          | 0(0.00) | 0(0.00) | 0(0.00)                                  | 0(0.00) | 0(0.00) | 1(0.30)                              | 0(0.00) | 0(0.00) | 0.6401     |
| Constipation                                       | 0(0.00)                              | 0(0.00) | 0(0.00) | 0(0.00)                          | 0(0.00) | 0(0.00) | 0(0.00)                                  | 0(0.00) | 0(0.00) | 0(0.00)                              | 1(0.30) | 0(0.00) | 0.5780     |
| Unsolicited event                                  | 9(3.95)                              | 2(0.88) | 0(0.00) | 2(0.86)                          | 3(1.29) | 0(0.00) | 3(1.47)                                  | 3(1.47) | 1(0.49) | 5(1.48)                              | 4(1.19) | 0(0.00) | 0.3882     |
| Systemic disease and administration site reactions | 3(1.32)                              | 0(0.00) | 0(0.00) | 1(0.43)                          | 1(0.43) | 0(0.00) | 1(0.49)                                  | 3(1.47) | 0(0.00) | 1(0.30)                              | 1(0.30) | 0(0.00) | 0.4895     |
| respiratory, chest and mediastinal diseases        | 4(1.75)                              | 0(0.00) | 0(0.00) | 1(0.43)                          | 0(0.00) | 0(0.00) | 1(0.49)                                  | 0(0.00) | 0(0.00) | 0(0.00)                              | 2(0.59) | 0(0.00) | 0.3300     |
| Neurological diseases                              | 2(0.88)                              | 0(0.00) | 0(0.00) | 0(0.00)                          | 1(0.43) | 0(0.00) | 0(0.00)                                  | 0(0.00) | 0(0.00) | 1(0.30)                              | 1(0.30) | 0(0.00) | 0.6248     |
| Mental illness                                     | 0(0.00)                              | 0(0.00) | 0(0.00) | 0(0.00)                          | 0(0.00) | 0(0.00) | 0(0.00)                                  | 2(0.98) | 0(0.00) | 1(0.30)                              | 0(0.00) | 0(0.00) | 0.2071     |

| Adverse events                                  | Hypertension group<br>(228 assigned) |         |         | Diabetes group<br>(233 assigned) |         |         | Combined disease group<br>(204 assigned) |         |         | Healthy population<br>(337 assigned) |         |         | <i>P</i> * |
|-------------------------------------------------|--------------------------------------|---------|---------|----------------------------------|---------|---------|------------------------------------------|---------|---------|--------------------------------------|---------|---------|------------|
|                                                 | Level 1                              | Level 2 | Level 3 | Level 1                          | Level 2 | Level 3 | Level 1                                  | Level 2 | Level 3 | Level 1                              | Level 2 | Level 3 |            |
| Musculoskeletal and connective tissue disorders | 0(0.00)                              | 1(0.44) | 0(0.00) | 0(0.00)                          | 0(0.00) | 0(0.00) | 0(0.00)                                  | 0(0.00) | 1(0.49) | 2(0.59)                              | 0(0.00) | 0(0.00) | 0.7288     |
| Gastrointestinal diseases                       | 0(0.00)                              | 0(0.00) | 0(0.00) | 0(0.00)                          | 2(0.86) | 0(0.00) | 0(0.00)                                  | 1(0.49) | 0(0.00) | 1(0.30)                              | 0(0.00) | 0(0.00) | 0.5154     |
| Metabolic and nutritional diseases              | 0(0.00)                              | 0(0.00) | 0(0.00) | 0(0.00)                          | 1(0.43) | 0(0.00) | 1(0.49)                                  | 0(0.00) | 0(0.00) | 0(0.00)                              | 0(0.00) | 0(0.00) | 0.4561     |
| heart diseases                                  | 1(0.44)                              | 0(0.00) | 0(0.00) | 0(0.00)                          | 0(0.00) | 0(0.00) | 0(0.00)                                  | 0(0.00) | 0(0.00) | 0(0.00)                              | 0(0.00) | 0(0.00) | 0.3347     |
| Eye diseases                                    | 0(0.00)                              | 1(0.44) | 0(0.00) | 0(0.00)                          | 0(0.00) | 0(0.00) | 0(0.00)                                  | 0(0.00) | 0(0.00) | 0(0.00)                              | 0(0.00) | 0(0.00) | 0.3347     |
| Infections and infectious diseases              | 0(0.00)                              | 0(0.00) | 0(0.00) | 0(0.00)                          | 1(0.43) | 0(0.00) | 0(0.00)                                  | 0(0.00) | 0(0.00) | 0(0.00)                              | 0(0.00) | 0(0.00) | 0.3476     |
| Skin and subcutaneous tissue diseases           | 0(0.00)                              | 0(0.00) | 0(0.00) | 0(0.00)                          | 0(0.00) | 0(0.00) | 0(0.00)                                  | 0(0.00) | 0(0.00) | 0(0.00)                              | 1(0.30) | 0(0.00) | 0.5780     |
| Kidney and urinary system diseases              | 0(0.00)                              | 0(0.00) | 0(0.00) | 0(0.00)                          | 0(0.00) | 0(0.00) | 0(0.00)                                  | 0(0.00) | 0(0.00) | 1(0.30)                              | 0(0.00) | 0(0.00) | 0.5780     |

\*Kruskal-Wallis test

**Table S5-2 Severity of adverse events 0-21 days after two doses of vaccine in people aged 70 and above**

[illegible]

[illegible]

| Adverse events                                 | Hypertension group<br>(99 assigned) |         |         | Diabetes group<br>(96 assigned) |         |         | Combined disease group<br>(92 assigned) |         |         | Healthy population<br>(143 assigned) |         |         | <i>P</i> * |
|------------------------------------------------|-------------------------------------|---------|---------|---------------------------------|---------|---------|-----------------------------------------|---------|---------|--------------------------------------|---------|---------|------------|
|                                                | Level 1                             | Level 2 | Level 3 | Level 1                         | Level 2 | Level 3 | Level 1                                 | Level 2 | Level 3 | Level 1                              | Level 2 | Level 3 |            |
| Infections and infectious diseases             | 0(0.00)                             | 1(1.01) | 0(0.00) | 0(0.00)                         | 1(1.04) | 0(0.00) | 0(0.00)                                 | 0(0.00) | 0(0.00) | 0(0.00)                              | 0(0.00) | 0(0.00) | 0.4905     |
| Injury, poisoning, and operation complications | 1(1.01)                             | 0(0.00) | 0(0.00) | 0(0.00)                         | 0(0.00) | 0(0.00) | 0(0.00)                                 | 0(0.00) | 1(1.09) | 0(0.00)                              | 0(0.00) | 0(0.00) | 0.4725     |
| Kidney and urinary system diseases             | 0(0.00)                             | 0(0.00) | 0(0.00) | 0(0.00)                         | 0(0.00) | 0(0.00) | 0(0.00)                                 | 0(0.00) | 0(0.00) | 0(0.00)                              | 1(0.70) | 1(0.70) | 0.2590     |
| Reproductive system and breast diseases        | 0(0.00)                             | 0(0.00) | 0(0.00) | 0(0.00)                         | 0(0.00) | 0(0.00) | 0(0.00)                                 | 0(0.00) | 0(0.00) | 0(0.00)                              | 1(0.70) | 0(0.00) | 0.5710     |
| Metabolic and nutritional diseases             | 0(0.00)                             | 0(0.00) | 0(0.00) | 0(0.00)                         | 1(1.04) | 0(0.00) | 0(0.00)                                 | 0(0.00) | 0(0.00) | 0(0.00)                              | 0(0.00) | 0(0.00) | 0.3235     |
| Various inspections                            | 1(1.01)                             | 0(0.00) | 0(0.00) | 0(0.00)                         | 0(0.00) | 0(0.00) | 0(0.00)                                 | 0(0.00) | 0(0.00) | 0(0.00)                              | 0(0.00) | 0(0.00) | 0.3416     |
| Skin and subcutaneous tissue diseases          | 0(0.00)                             | 1(1.01) | 0(0.00) | 0(0.00)                         | 0(0.00) | 0(0.00) | 0(0.00)                                 | 0(0.00) | 0(0.00) | 0(0.00)                              | 0(0.00) | 0(0.00) | 0.3416     |
| Eye diseases                                   | 0(0.00)                             | 0(0.00) | 0(0.00) | 0(0.00)                         | 0(0.00) | 0(0.00) | 0(0.00)                                 | 0(0.00) | 0(0.00) | 1(0.70)                              | 0(0.00) | 0(0.00) | 0.5710     |

\*\*Kruskal-Wallis test
